# Supplementary material for: Activity and Stability of Trypsin Immobilized onto Chitosan Magnetic Nanoparticles
Source: Hindawi journal article supplement (doi:10.1155/2017/1457072), 2017-01-01
Supplement: f1 [file 1457072.f1.docx]

Figure 1 FTIR spectra of native trypsin and immobilized trypsin (1600 ‒1700cm-1).
